# Supplementary material for: Efficient selective hydrogenation of N,N-dimethylaniline in a continuous fixed-bed reactor over a Cu/Ni–Al2O3 catalyst
Source: Royal Society of Chemistry journal article supplement (doi:10.1039/d6ra01119e), 2026-04-13

Supporting Information for:

**Efficient Selective Hydrogenation of N,N-Dimethylaniline in  
a Continuous Fixed-bed Reactor over Cu/Ni-Al<sub>2</sub>O<sub>3</sub> Catalyst**

Jingdong Nong,<sup>a</sup> Zhonghua Sun,<sup>a</sup> Weiyu Zhou,<sup>a</sup> Zhong Wu,<sup>a</sup> Junfeng Qian,<sup>a</sup> Qun Chen,<sup>a</sup> Mingyang He<sup>a</sup>

<sup>a</sup> Jiangsu Key Laboratory of Advanced Catalytic Materials and Technology, Changzhou University, 213164 Changzhou, China

## Table of Contents

|                                                                                                                      |          |
|----------------------------------------------------------------------------------------------------------------------|----------|
| <b>Experimental .....</b>                                                                                            | <b>3</b> |
| <b>Characterization of recycled 0.1Cu/Ni-Al<sub>2</sub>O<sub>3</sub> catalyst .....</b>                              | <b>4</b> |
| <b>The HR-TEM images for 0.1Cu/Ni-Al<sub>2</sub>O<sub>3</sub> catalyst .....</b>                                     | <b>5</b> |
| <b>Table S1. The element contents of the 0.1Cu/Ni-Al<sub>2</sub>O<sub>3</sub> catalyst analyzed by SEM-EDS .....</b> | <b>6</b> |
| <b>Table S2. Effect of metal additives on hydrogenation performance .....</b>                                        | <b>7</b> |
| <b>Gas chromatograms of raw materials and products (quantitative analysis) .....</b>                                 | <b>8</b> |
| <b>Gas chromatography-mass spectrometry of raw materials and products (qualitative analysis).....</b>                | <b>9</b> |

## Experimental

### Chemicals and reagents

All the reagents and solvents in the study were analytically pure and were all purchased from Aladdin or Sinopharm Chemical Reagent Co., Ltd. (Shanghai, China) and used as received.

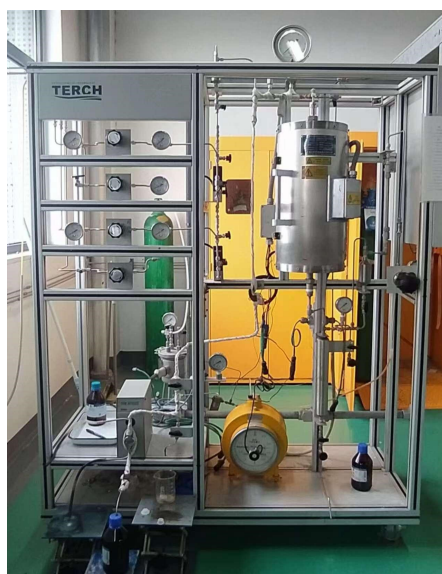

**Fig. S1** The photograph of the continuous fixed-bed reactor and the reaction.

### Catalytic Hydrogenation of N,N-Dimethylaniline over a Fixed-Bed Reactor

N,N-Dimethylaniline (N,N-DMA) and hydrogen gas were introduced into a fixed-bed reactor at a volumetric feed ratio of 1:5500 (N,N-DMA:H<sub>2</sub>). The reaction was conducted under continuous flow conditions at 130 °C and 5 MPa H<sub>2</sub> pressure, using 20 mL of 0.1 wt% Cu/Ni–Al<sub>2</sub>O<sub>3</sub> catalyst. After an initial 4-hour stabilization period, steady-state sampling was performed at 2-hour intervals for a total of three consecutive samples. Product composition was determined quantitatively and qualitatively via gas chromatography (GC) and gas chromatography–mass spectrometry (GC–MS).

## Characterization of recycled 0.1Cu/Ni-Al<sub>2</sub>O<sub>3</sub> catalyst

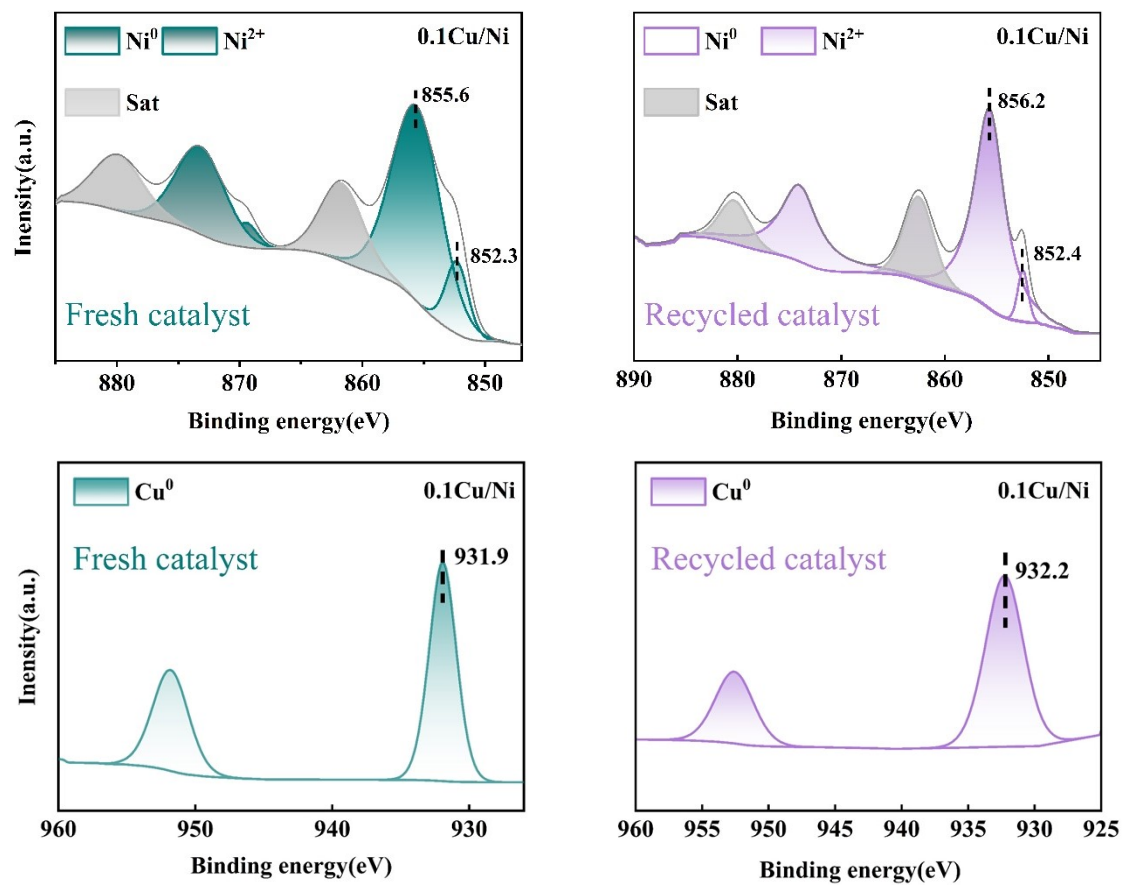

Fig. S2 XPS spectra for fresh and recycled 0.1Cu/Ni-Al<sub>2</sub>O<sub>3</sub> catalyst.

The HR-TEM analysis for 0.1Cu/Ni-Al<sub>2</sub>O<sub>3</sub> catalyst

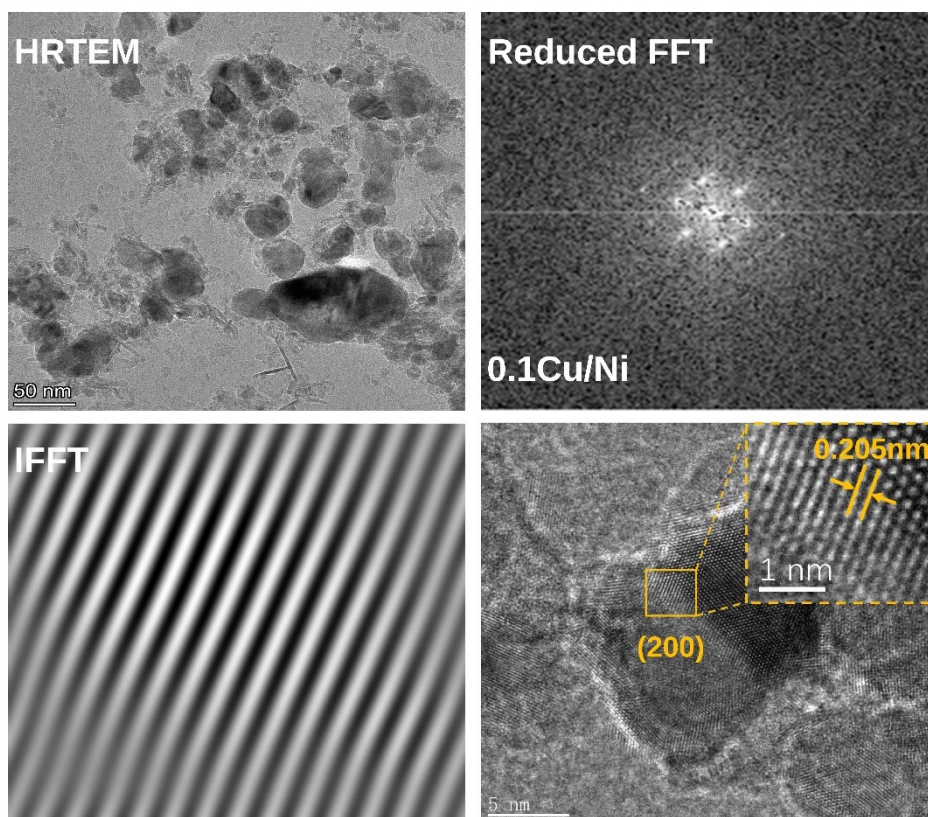

Fig. S3 The HR-TEM analysis for 0.1Cu/Ni-Al<sub>2</sub>O<sub>3</sub> catalyst.

The data in Table S1 were obtained through scanning electron microscopy and X-ray energy spectrum analysis for the 0.1Cu/Ni-Al<sub>2</sub>O<sub>3</sub> catalyst with the best catalytic performance. The atomic ratio of Cu to Ni in this catalyst was close to the theoretical value (Cu/Ni = 0.1)

**Table S1. The element contents of the 0.1Cu/Ni-Al<sub>2</sub>O<sub>3</sub> catalyst analyzed by SEM-EDS**

| Element | Line Type | Weight % | Weight Sigma % | Atomic % |
|---------|-----------|----------|----------------|----------|
| O       | K series  | 40.55    | 1.06           | 57.76    |
| Al      | K series  | 42.10    | 1.05           | 35.56    |
| Ni      | K series  | 15.72    | 1.05           | 6.10     |
| Cu      | L series  | 1.62     | 1.93           | 0.58     |
| Total   |           | 100      |                | 100      |

The data in Table S2 is used to investigate the effects of five different metal additives (Cu, Ru, Fe, Co, and Sn) on the hydrogenation performance of the catalyst Ni-Al<sub>2</sub>O<sub>3</sub> for N,N-DMA. During the investigation, the loading amount of the additives and the reaction conditions were kept consistent. The results include the conversion rate of the raw material N,N-DMA, the selectivity of the product DMCHA, and the selectivity of the main by-product N-Me-CyH.

**Table S2. Effect of metal additives on hydrogenation performance**

| Metal additives | N,N-DMA Conversion (%) | DMCHA Selectivity (%) | N-Me-CyH Selectivity (%) |
|-----------------|------------------------|-----------------------|--------------------------|
| --              | 89.5                   | 89.1                  | 8.6                      |
| Cu              | 89.4                   | 94.5                  | 3.9                      |
| Ru              | 89.4                   | 86.1                  | 7.7                      |
| Fe              | 89.3                   | 91.2                  | 6.6                      |
| Co              | 89.2                   | 83.0                  | 8.5                      |
| Sn              | 89.5                   | 90.7                  | 7.1                      |

Reaction conditions: 20 ml catalyst, P = 5 MPa, T = 120 °C, LHSV = 0.2 h<sup>-1</sup> and H<sub>2</sub> / N,N-DMA (v/v)

= 3500, X/Ni molar ratio = 0.1

## Gas chromatograms of raw materials and products (quantitative analysis)

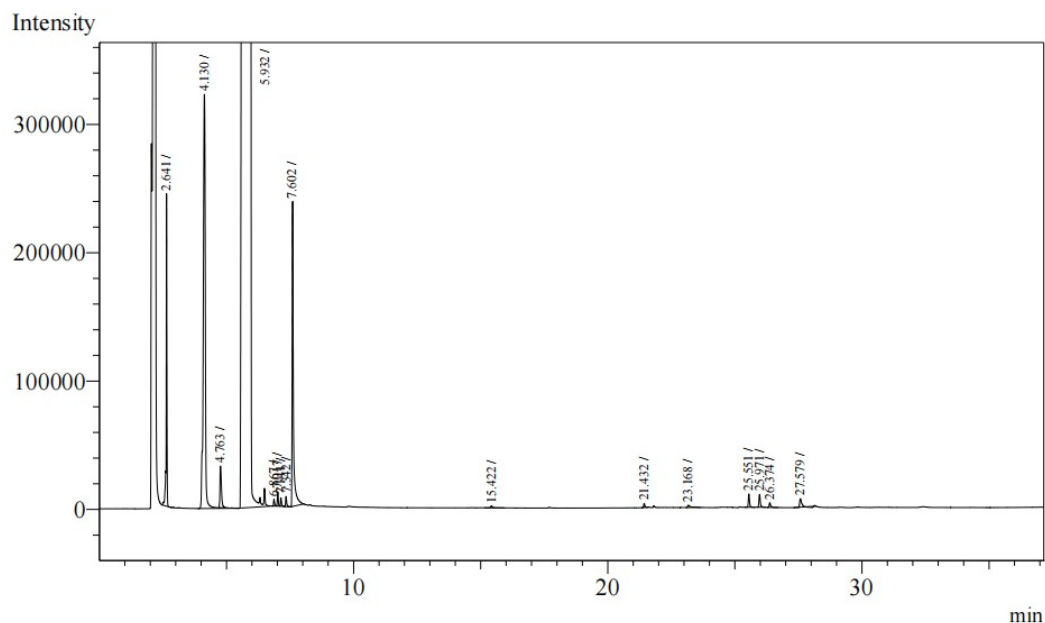

| Peak# | Ret.Time | Area      | Height   | Conc.  | Unit | Mark | ID# | Cmpd Name |
|-------|----------|-----------|----------|--------|------|------|-----|-----------|
| 1     | 2.641    | 455069    | 223130   | 0.317  |      |      |     |           |
| 2     | 4.130    | 1798767   | 321068   | 1.252  |      | S    |     |           |
| 3     | 4.763    | 129837    | 32444    | 0.090  |      | T    |     |           |
| 4     | 5.932    | 140284498 | 12006935 | 97.630 |      |      |     |           |
| 5     | 6.867    | 14126     | 5114     | 0.010  |      |      |     |           |
| 6     | 7.017    | 28452     | 11000    | 0.020  |      |      |     |           |
| 7     | 7.141    | 17886     | 6529     | 0.012  |      |      |     |           |
| 8     | 7.342    | 23576     | 7942     | 0.016  |      |      |     |           |
| 9     | 7.602    | 792860    | 231260   | 0.552  |      |      |     |           |
| 10    | 15.422   | 7919      | 1537     | 0.006  |      |      |     |           |
| 11    | 21.432   | 8413      | 3268     | 0.006  |      |      |     |           |
| 12    | 23.168   | 14581     | 1826     | 0.010  |      |      |     |           |
| 13    | 25.551   | 33526     | 10296    | 0.023  |      |      |     |           |
| 14    | 25.971   | 36277     | 9904     | 0.025  |      |      |     |           |
| 15    | 26.374   | 14825     | 3639     | 0.010  |      |      |     |           |
| 16    | 27.579   | 28793     | 6574     | 0.020  |      |      |     |           |
| Total |          | 143689405 | 12882466 |        |      |      |     |           |

### Product main ingredient list

| Peak        | 1           | 2                       | 3            | 4                           | 9                   |
|-------------|-------------|-------------------------|--------------|-----------------------------|---------------------|
| Component   | Cyclohexane | N-methylcyclohexylamine | Cyclohexanol | N,N-dimethylcyclohexylamine | N,N-dimethylaniline |
| Content (%) | 0.3         | 1.25                    | 0.1          | 97.6                        | 0.5                 |

## Gas chromatography-mass spectrometry of raw materials and products (qualitative analysis)

Product Gas chromatography mass spectrum overview

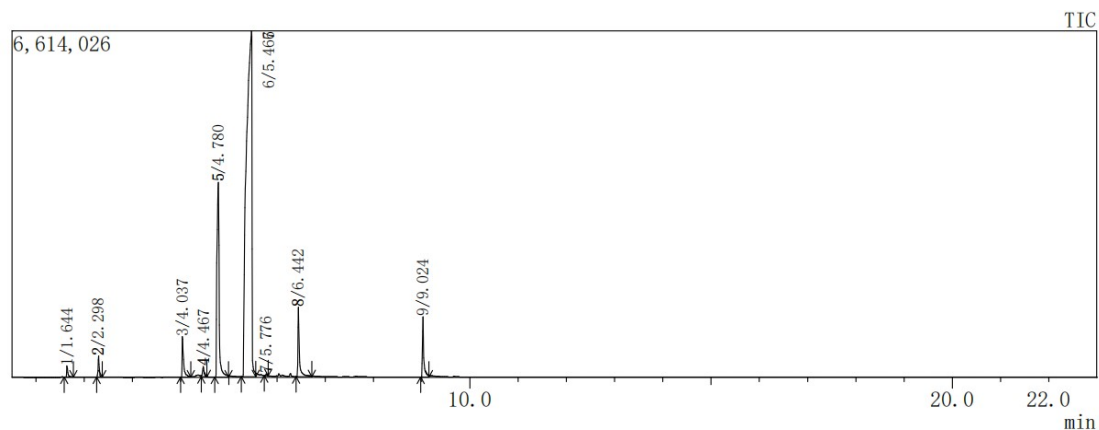

Component name: N,N-dimethylcyclohexylamine

Molecular formula: C<sub>8</sub>H<sub>17</sub>N, CAS number: 98-94-2, Molecular weight: 127, Retention index: 929

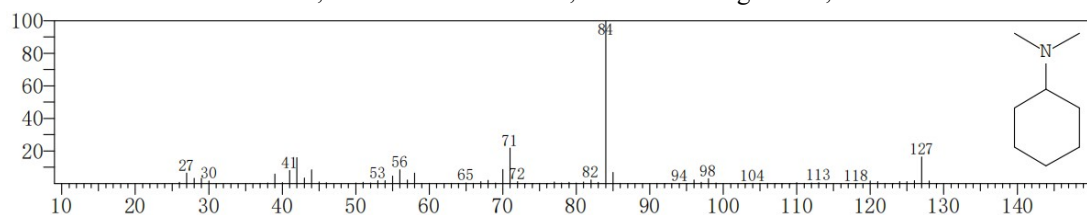

Component name: N-methylcyclohexylamine

Molecular formula: C<sub>7</sub>H<sub>15</sub>N, CAS number: 100-60-7, Molecular weight: 113, Retention index: 979

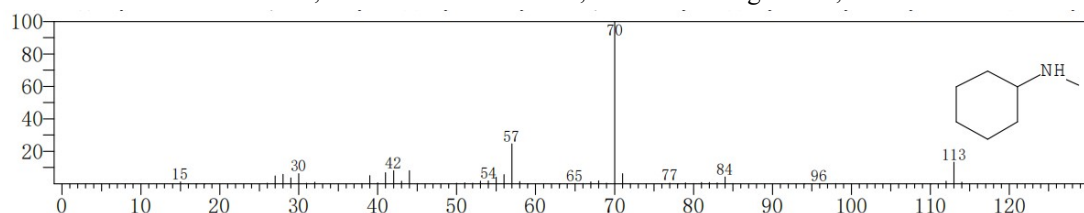

Component name: Cyclohexanol

Molecular formula: C<sub>6</sub>H<sub>12</sub>O, CAS number: 108-93-0, Molecular weight: 100, Retention index: 908

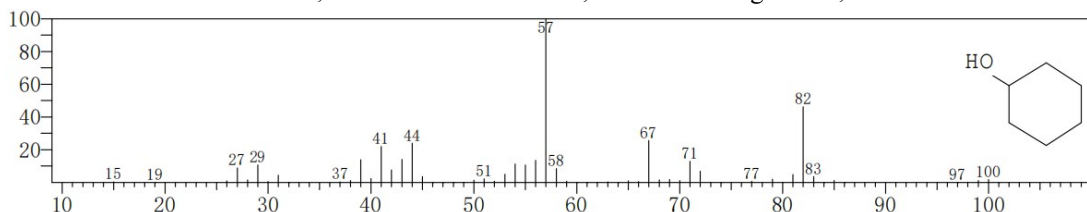

Component name: Cyclohexane

Molecular formula: C<sub>6</sub>H<sub>12</sub>, CAS number: 110-82-7, Molecular weight: 84, Retention index: 719

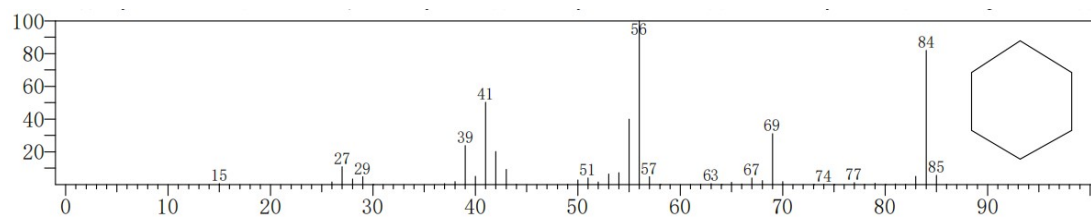

Component name: N,N-dimethylaniline

Molecular formula: C<sub>8</sub>H<sub>11</sub>N, CAS number: 121-69-7, Molecular weight: 121, Retention index: 942

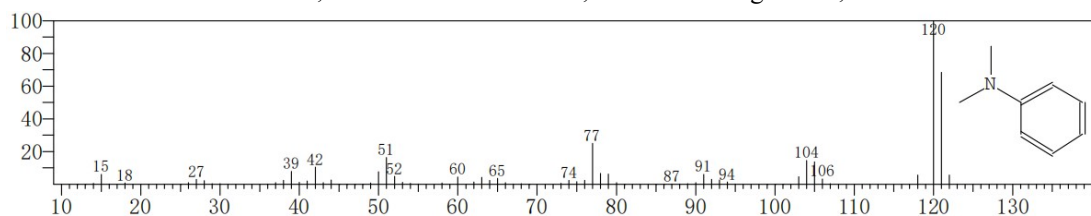

Supplement: d6ra01119e1.pdf [file d6ra01119e1.pdf]
